# Supplementary material
Source: PubMed Central journal article supplement (PMC1904114)

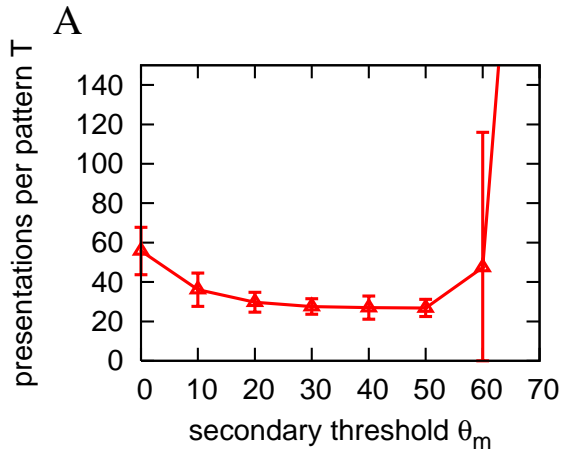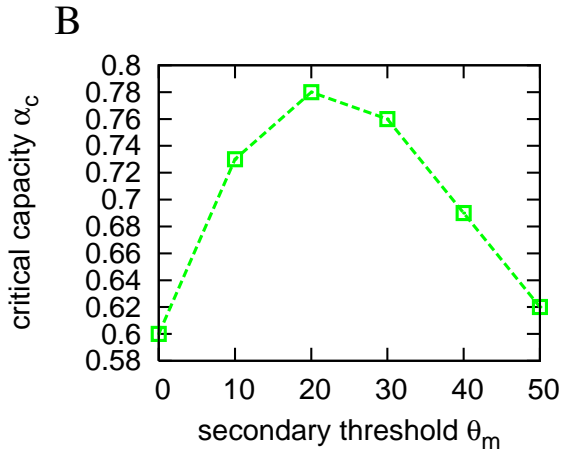

Supplement: pnas_0700324104_1.pdf [file pnas_0700324104_1.pdf]

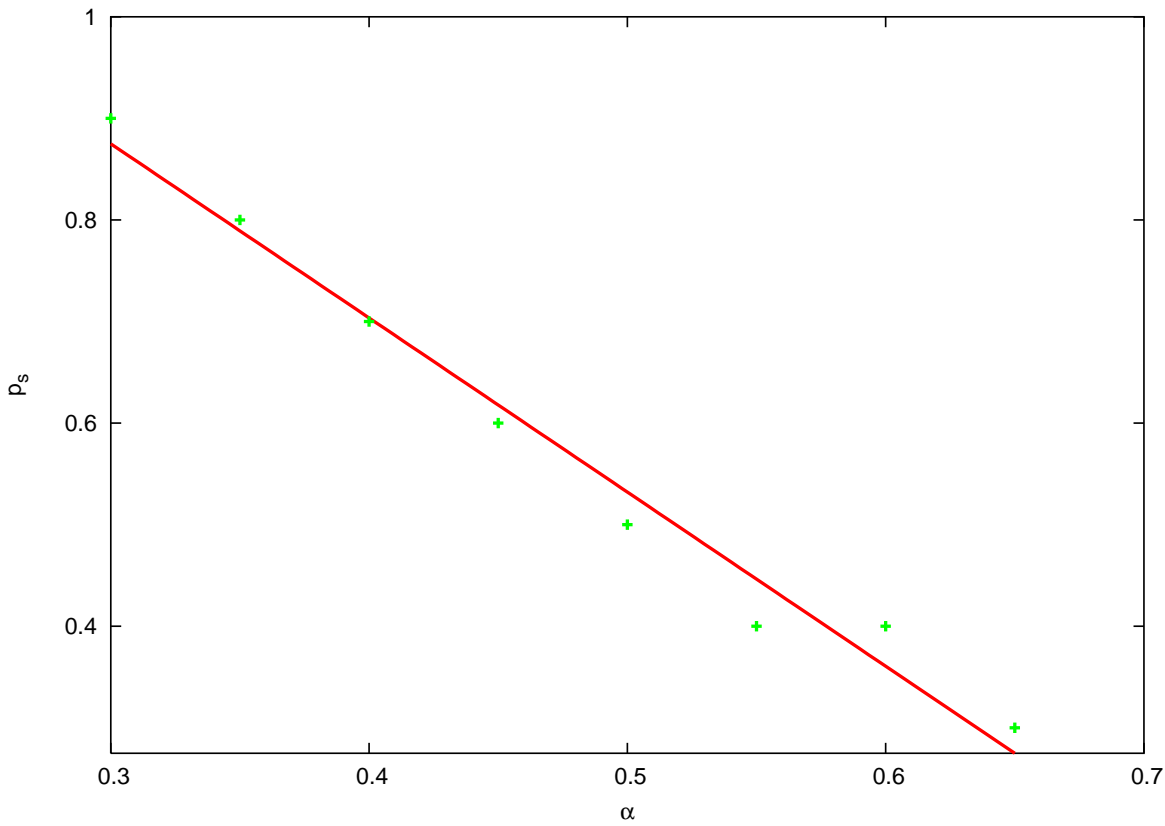

Supplement: pnas_0700324104_2.pdf [file pnas_0700324104_2.pdf]

A

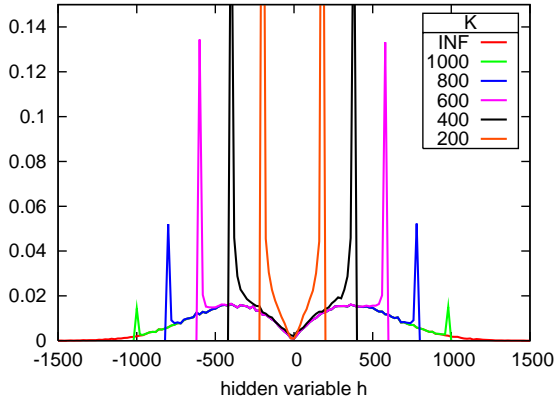

B

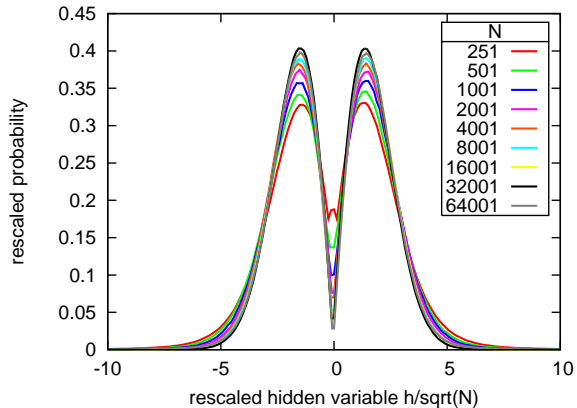

Supplement: pnas_0700324104_3.pdf [file pnas_0700324104_3.pdf]

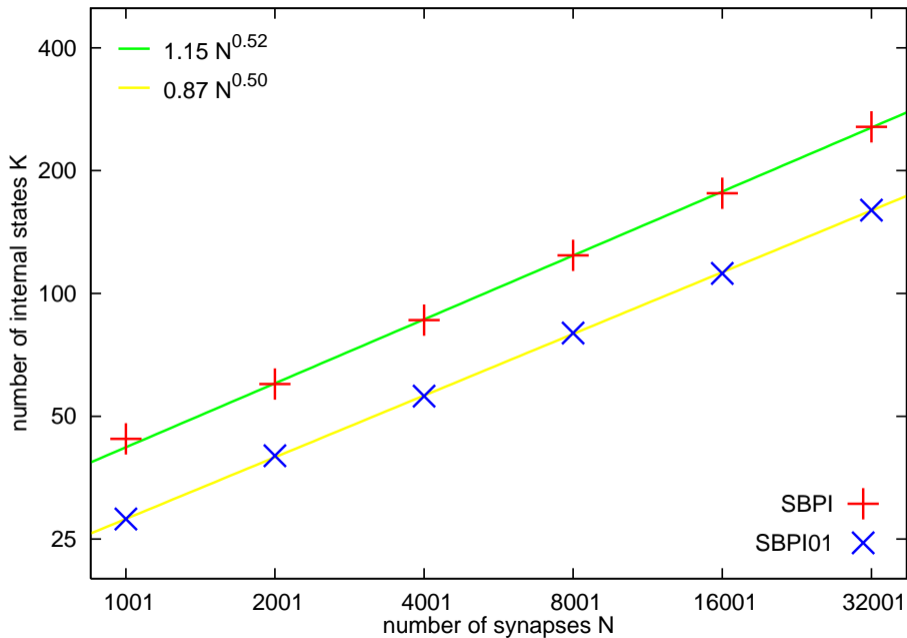

Supplement: pnas_0700324104_4.pdf [file pnas_0700324104_4.pdf]

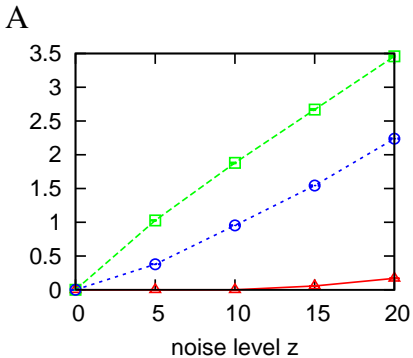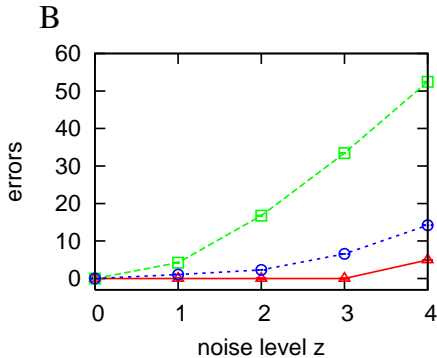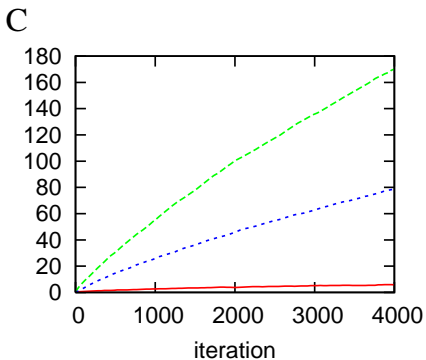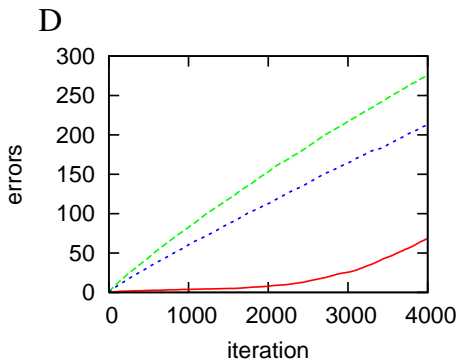

Supplement: pnas_0700324104_5.pdf [file pnas_0700324104_5.pdf]
